# Supplementary material
Source: PubMed Central journal article supplement (PMC3176295)
Supplement: NIHMS315184-supplement-01.pdf [file NIHMS315184-supplement-01.pdf]

# SUPPORTING INFORMATION

## Novel Urea Derivatives as Anti-Tuberculosis Agents

*Joshua R. Brown,<sup>a</sup> Elton J. North,<sup>a</sup> Julian G. Hurdle,<sup>a</sup> Christophe Morisseau,<sup>b</sup> Jerrod Scarborough,<sup>a</sup> Dianqing Sun,<sup>a</sup> Jana Korduláková,<sup>c</sup> Michael S. Scherman,<sup>d</sup> Victoria Jones,<sup>d</sup> Anna Grzegorzewicz,<sup>d</sup> Rebecca M. Crew,<sup>d</sup> Mary Jackson,<sup>d</sup> Michael R. McNeil<sup>d</sup> and Richard E. Lee<sup>a\*</sup>*

<sup>a</sup>Department of Chemical Biology and Therapeutics, St Jude Children's Research Hospital, 262 Danny Thomas Place, Mail Stop 1000, Memphis, TN 38105, USA

<sup>b</sup>Department of Entomology and Cancer Center, University of California, Davis, CA 95616

<sup>c</sup> Department of Biochemistry, Faculty of Natural Sciences, Comenius University, Mlynska dolina CH-1, 84215 Bratislava, Slovak Republic

<sup>d</sup>Mycobacteria Research Laboratories, Department of Microbiology, Immunology and Pathology, Colorado State University, Fort Collins, CO 80523, USA

<sup>a</sup>Department of Chemical Biology and Therapeutics, St Jude Children's Research Hospital, 262 Danny Thomas Place, Mail Stop 1000, Memphis, TN 38105

<sup>b</sup>Department of Entomology and UC Davis Cancer Center, University of California, Davis, CA 95616, USA

<sup>c</sup> Department of Biochemistry, Faculty of Natural Sciences, Comenius University, Mlynska dolina CH-1, 84215 Bratislava, Slovak Republic

<sup>d</sup>Mycobacteria Research Laboratories, Department of Microbiology, Immunology and Pathology, Colorado State University, Fort Collins, CO 80523, USA

\* Author to whom correspondence should be addressed.

**REL:** Department of Chemical Biology and Therapeutics, St Jude Children's Research Hospital, 262 Danny Thomas Place, Mail Stop 1000, Memphis, TN 38105. Tel: (901) 595 6617; Email: Richard.Lee@stjude.org

## CONTENTS

RP-HPLC purity and retention times Table S1

Table S2, S3, S4 MIC data for the compounds synthesized against non-tuberculous bacteria

Table S1

| <b>Compound #</b> | <b>Rt (M1)</b> | <b>Rt (M2)</b> | <b>% Purity (UV)<sup>a</sup></b> | <b>% Purity ELSD (M1)</b> | <b>% Purity ELSD (M2)</b> |
|-------------------|----------------|----------------|----------------------------------|---------------------------|---------------------------|
| 1                 | 6.15           |                | >98%                             | >98%                      |                           |
| 2                 | 6.35           |                | >98%                             | 97%                       |                           |
| 3                 | 6.44           |                | 95%                              | 96%                       |                           |
| 4                 | 6.29           |                | 95%                              | 95%                       |                           |
| 5                 | 6.39           |                | 96%                              | 97%                       |                           |
| 6                 | 6.42           |                | 95%                              | 95%                       |                           |
| 7                 | 6.21           |                | 95%                              | 96%                       |                           |
| 8                 | 5.88           |                | 95%                              | 95%                       |                           |
| 9                 | 5.67           |                | 95%                              | 95%                       |                           |
| 10                | 6.02           |                | 95%                              | 96%                       |                           |
| 11                | 6.12           |                | >98%                             | >98%                      |                           |
| 12                | 5.98           |                | 97%                              | 97%                       |                           |
| 13*               | 5.98           | 5.27           | 95%                              | 96%                       | 97%                       |
| 14                | 6.39           |                | >98%                             | >98%                      |                           |
| 15                | 5.73           | 4.89           |                                  | 96%                       | 97%                       |
| 16                | 5.98           | 5.23           |                                  | 96%                       | 97%                       |
| 17                | 5.77           | 4.91           |                                  | 96%                       | 96%                       |
| 18                | 6.14           | 5.44           |                                  | 96%                       | 96%                       |
| 19                | 6.19           | 5.42           |                                  | 97%                       | >98%                      |
| 20                | 6.33           | 5.65           |                                  | >98%                      | >98%                      |
| 21                | 6.48           | 5.88           |                                  | >98%                      | >98%                      |
| 22                | 6.56           |                | >98%                             | >98%                      |                           |
| 23                | 6.37           |                | 95%                              | 97%                       |                           |
| 24                | 6.35           |                | >98%                             | >98%                      |                           |
| 25                | 5.91           |                | 95%                              | 95%                       |                           |
| 26                | 6.25           |                | >98%                             | >98%                      |                           |
| 27                | 6.42           |                | >98%                             | >98%                      |                           |

|    |      |      |      |      |      |
|----|------|------|------|------|------|
| 28 | 6.37 |      | >98% | >98% |      |
| 29 | 6.27 |      | 96%  | 97%  |      |
| 30 | 6.12 |      | 96%  | 95%  |      |
| 31 | 6.25 |      | >98% | >98% |      |
| 32 | 6.51 |      | >98% | >98% |      |
| 33 | 6.29 |      | >98% | >98% |      |
| 34 | 6.56 |      | >98% | >98% |      |
| 35 | 5.94 |      | >98% | >98% |      |
| 36 | 6.29 |      | >98% | >98% |      |
| 37 | 5.79 | 4.82 |      | 97%  | >98% |
| 38 | 5.69 | 4.69 |      | 96%  | 96%  |
| 39 | 5.98 | 5.05 |      | 95%  | 95%  |
| 40 | 6.02 | 5.13 |      | 97%  | >98% |
| 41 | 6.62 |      | 95%  | 97%  |      |

---

<sup>a</sup> Compounds were monitored for UV absorbance at 254 nm wavelength

\* Compounds 13 was monitored for UV absorbance at 215 nm wavelength





|                                                                                     |           |      |      |      |      |      |      |      |      |
|-------------------------------------------------------------------------------------|-----------|------|------|------|------|------|------|------|------|
| 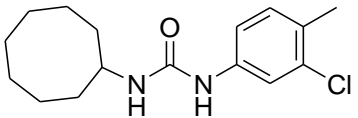   | <b>24</b> | >200 | >200 | >200 | >200 | >200 | >200 | >200 | 0.8  |
|    | <b>26</b> | >200 | >200 | >200 | >200 | >200 | >200 | >200 | 25   |
|    | <b>30</b> | >200 | >200 | >200 | >200 | >200 | >200 | >200 | >200 |
|    | <b>27</b> | >200 | >200 | >200 | >200 | >200 | >200 | >200 | 100  |
|    | <b>28</b> | >200 | 3.12 | >200 | 25   | >200 | >200 | >200 | 0.4  |
|   | <b>29</b> | 100  | >200 | >200 | 6.25 | >200 | >200 | >200 | 6.25 |
|  | <b>5</b>  | >200 | 3.12 | 3.12 | 1.6  | >200 | >200 | >200 | 0.8  |





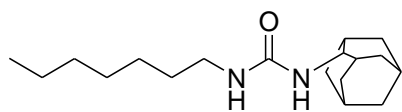

**21**

>200

>200

>200

>200

>200

>200

>200

1.6

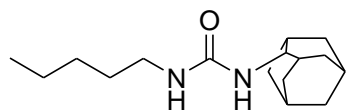

**19**

>200

>200

>200

>200

>200

>200

>200

12.5

Table S3

| Compound                                                                            | No. | <i>E. fae</i> | <i>B. anthracis</i> | <i>S. aureus</i> | <i>E. coli</i> ToIC | <i>E. coli</i> K12 | <i>P. aeruginosa</i> | Klebsiella | <i>M. smeg</i> |
|-------------------------------------------------------------------------------------|-----|---------------|---------------------|------------------|---------------------|--------------------|----------------------|------------|----------------|
| 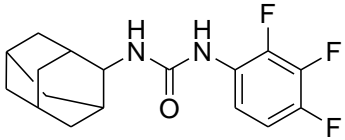   | 1   | >200          | >200                | >200             | >200                | >200               | >200                 | >200       | 1.6            |
|    | 31  | >200          | 3.12                | >200             | 3.12                | >200               | >200                 | >200       | NA             |
|    | 33  | >200          | >200                | >200             | 25                  | >200               | >200                 | >200       | NA             |
|   | 34  | >200          | >200                | >200             | 12.5                | >200               | >200                 | >200       | 200            |
|  | 32  | >200          | >200                | >200             | 12.5                | >200               | >200                 | >200       | 50             |



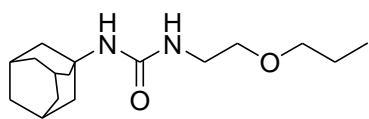

**40**

>200

>200

>200

200

>200

>200

>200

200

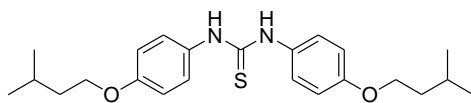

**42**

>200

>200

>200

>200

>200

>200

>200

>200
